# Supplementary material for: Disrupted development from head to tail: Pervasive effects of postnatal restricted resources on neurobiological, behavioral, and morphometric outcomes
Source: Frontiers journal article supplement (doi:10.3389/fnbeh.2022.910056), 2022-08-05
Supplement: Table_1.pdf [file Table_1.pdf]

Table 1. Litter characteristics\*

| Mom ID    | Resource Group    | Number of Pups | Males | Females |
|-----------|-------------------|----------------|-------|---------|
| <b>1</b>  | Standard Resource | 13             | 8     | 5       |
| <b>2</b>  | Standard Resource | 11             | 6     | 5       |
| <b>5</b>  | Standard Resource | 11             | 6     | 5       |
| <b>6</b>  | Low Resource      | 11             | 6     | 5       |
| <b>7</b>  | Low Resource      | 11             | 5     | 6       |
| <b>8</b>  | Standard Resource | 10             | 4     | 6       |
| <b>9</b>  | Low Resource      | 13             | 8     | 5       |
| <b>10</b> | Standard Resource | 10             | 5     | 5       |
| <b>11</b> | Low Resource      | 10             | 10    | 0       |
| <b>12</b> | Standard Resource | 12             | 7     | 5       |

\*The number of male and female pups for each litter used in the study; note females #3 and #4 did not get pregnant and are not included in the list.
